# Supplementary material for: Superconducting boron allotrope featuring pentagonal bipyramid at ambient pressure
Source: Royal Society of Chemistry journal article supplement (doi:10.1039/d3cp00692a), 2023-01-01
Supplement: d3cp00692a1.pdf [file d3cp00692a1.pdf]

## Supplementary Material

### Superconducting boron allotrope featuring pentagonal bipyramid at ambient pressure

Shuai Han<sup>1,3</sup>, Yunxian Liu<sup>1,2\*</sup>, Chao Wang<sup>1,2</sup>, Wencai Yi<sup>1,2</sup>, Xin Chen<sup>1,2</sup>, Yongsheng Zhang<sup>1,2</sup> and  
Xiaobing Liu<sup>1,2\*</sup>

<sup>1</sup>Laboratory of High Pressure Physics and Material Science, School of Physics and Physical Engineering, Qufu Normal University, Qufu, Shandong Province, 273165, China

<sup>2</sup>Advanced Research Institute of Multidisciplinary Sciences, Qufu Normal University, Qufu, Shandong Province, 273165, China

<sup>3</sup>Center for High Pressure Science and Technology Advanced Research, Beijing, 100094, China

**Email:** [yunxianliu@qfnu.edu.cn](mailto:yunxianliu@qfnu.edu.cn); [xiaobing.phy@qfnu.edu.cn](mailto:xiaobing.phy@qfnu.edu.cn)

## Supplemental figures

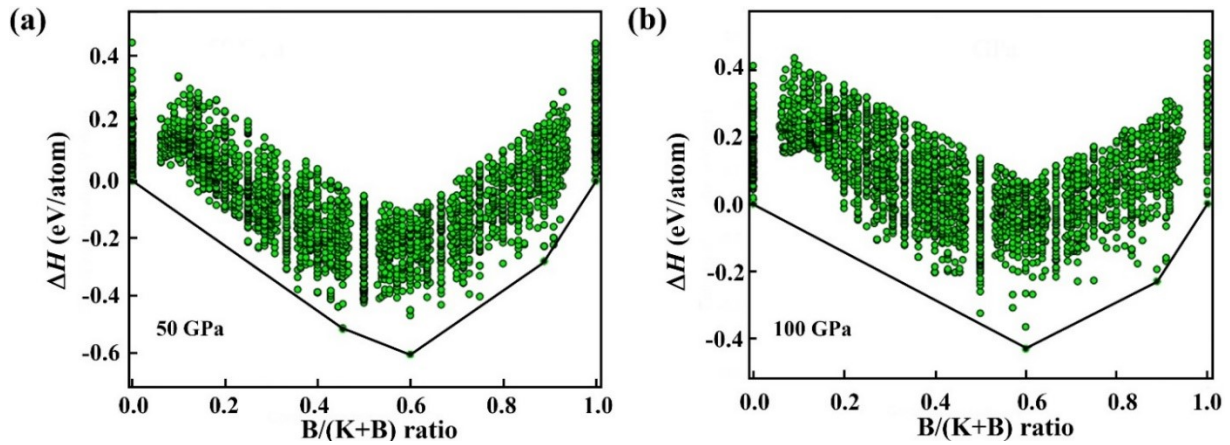

**Figure S1.** Variable composition structural searches at fixed pressure of 50 and 100 GPa for the K–B system. We consider the maximum composition is K:B = 1:10 in the B-rich region.

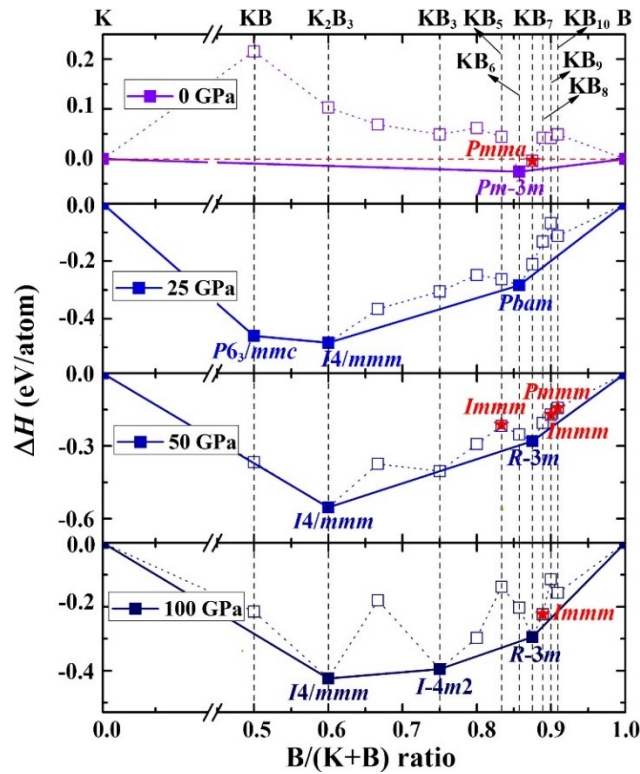

**Figure S2.** Formation enthalpies of predicted K–B compounds with various composition ratios at 0 GPa, 25 GPa, 50 GPa and 100 GPa. The stable configurations on the convex hull are marked by solid symbols, while unstable configurations are marked by open symbols. The red stars near convex hull represent metastable phases of K–B compounds with higher enthalpy. Four new B-rich stoichiometries (i.e., KB,  $K_2B_3$ ,  $KB_3$ ,  $KB_7$ ) emerge on the convex hull at high pressure, and the low-pressure  $Pm-3m$   $KB_6$  phase<sup>1, 2</sup> is well reproduced, indicating our adopted structure searching method apply to the K–B system.

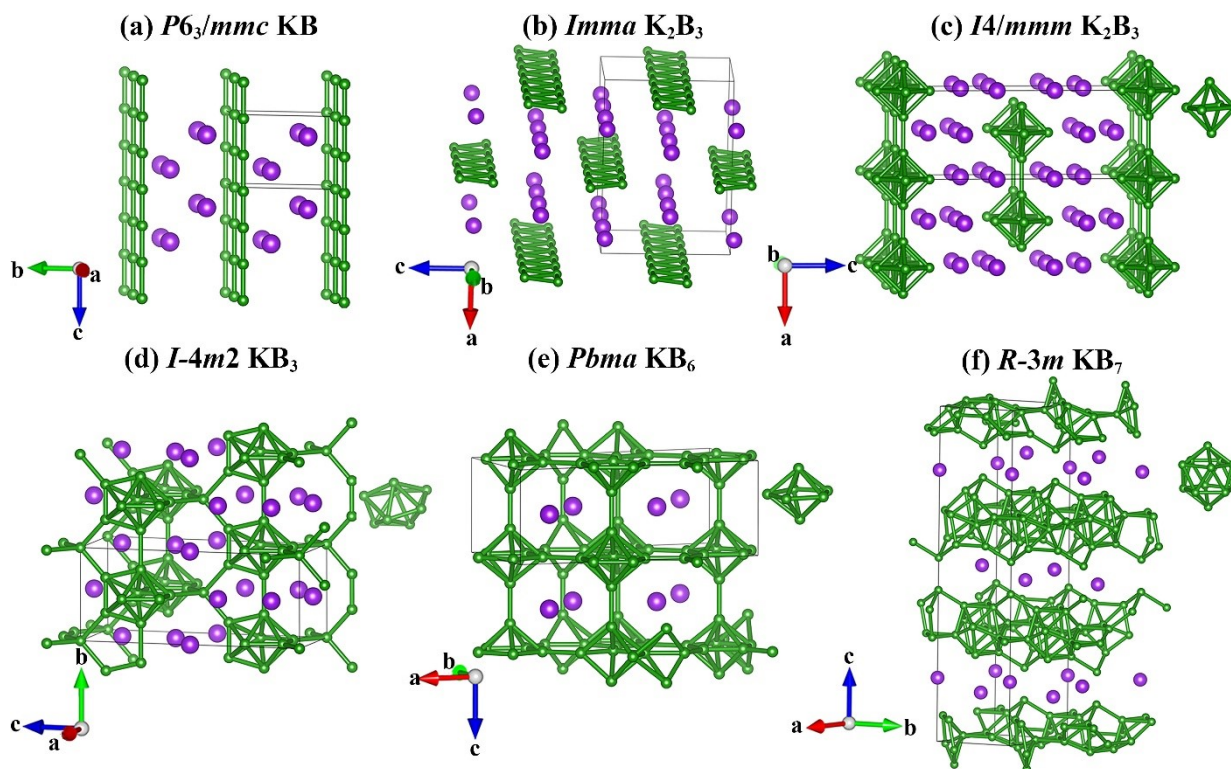

**Figure S3.** The predicted new stable structures in the K–B system. (a)  $P6_3/mmc$  KB, (b)  $Imma$   $K_2B_3$ , (c)  $I4/mmm$   $K_2B_3$ , (d)  $I-4m2$   $KB_3$ , (e)  $Pbma$   $KB_6$  and (f)  $R-3m$   $KB_7$ .

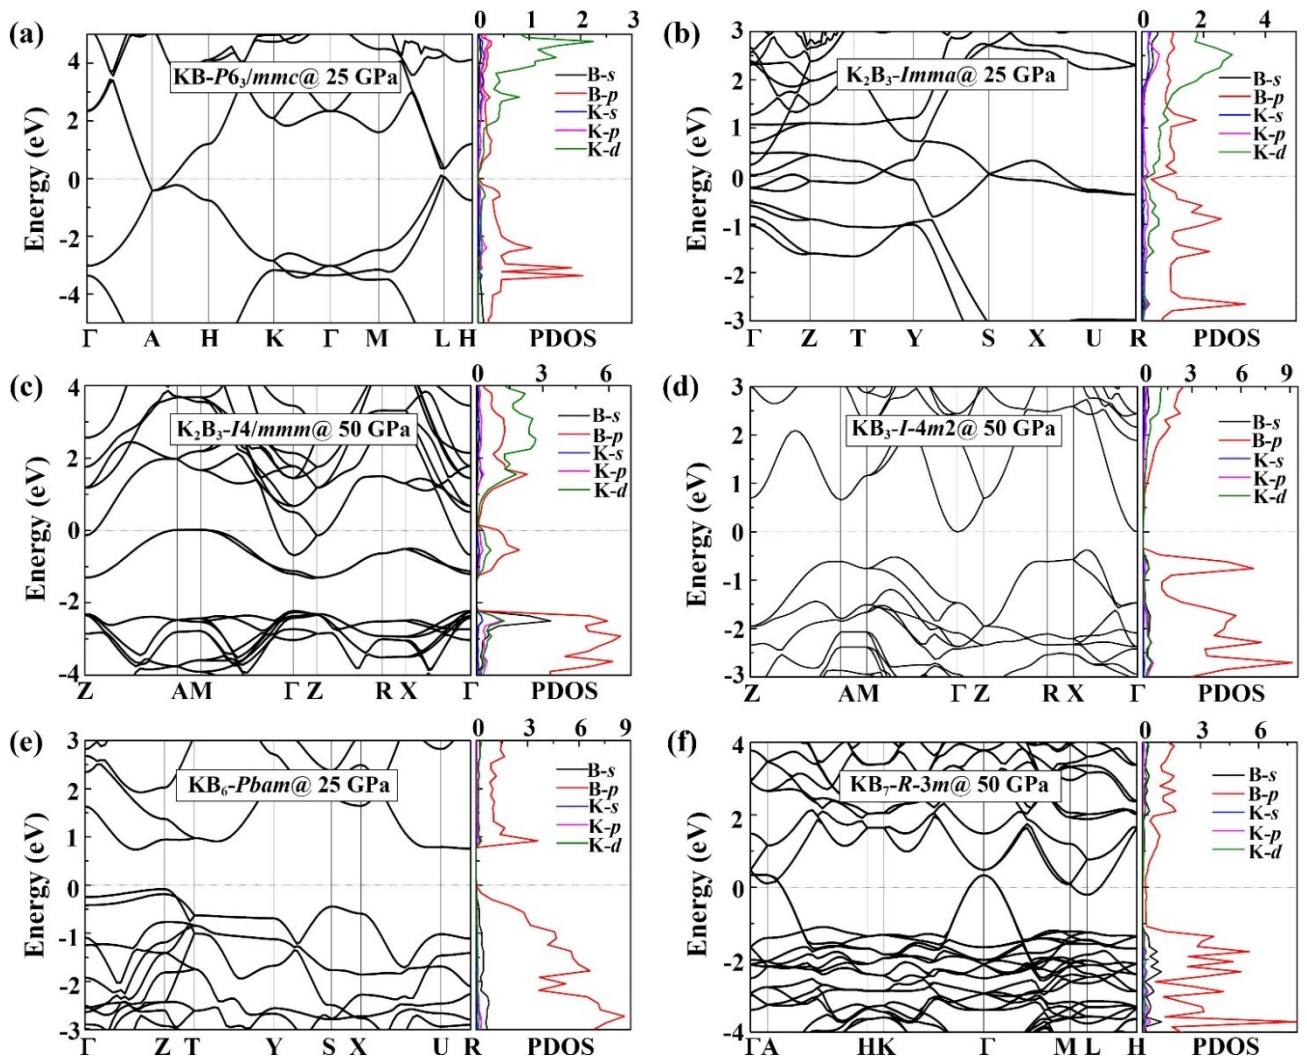

**Figure S4.** Electronic band structures and corresponding projected density of states (PDOS) of the predicted K–B compounds. (a)  $P6_3/mmc$  KB at 25 GPa. (b)  $Imma$   $K_2B_3$  at 25 GPa. (c)  $I4/mmm$   $K_2B_3$  at 50 GPa. (d)  $I-4m2$   $KB_3$  at 50 GPa. (e)  $Pbma$   $KB_6$  at 25 GPa. (f)  $R-3m$   $KB_7$  at 50 GPa.

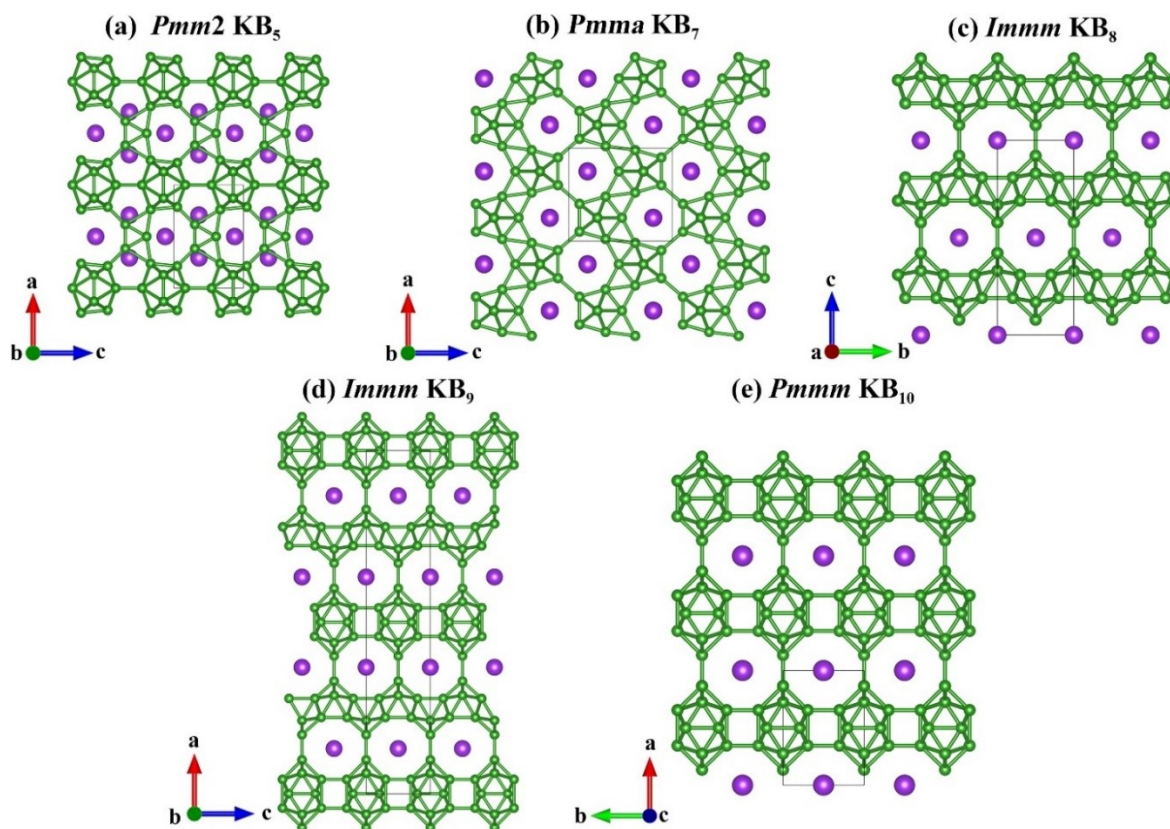

**Figure S5.** The crystal structures of (a) *Pmm2* KB<sub>5</sub> at 50 GPa, (b) *Pmma* KB<sub>7</sub> at 0 GPa, (c) *Immm* KB<sub>8</sub> at 100 GPa, (d) *Immm* KB<sub>9</sub> at 50 GPa and (e) *Pmmm* KB<sub>10</sub> at 50 GPa.

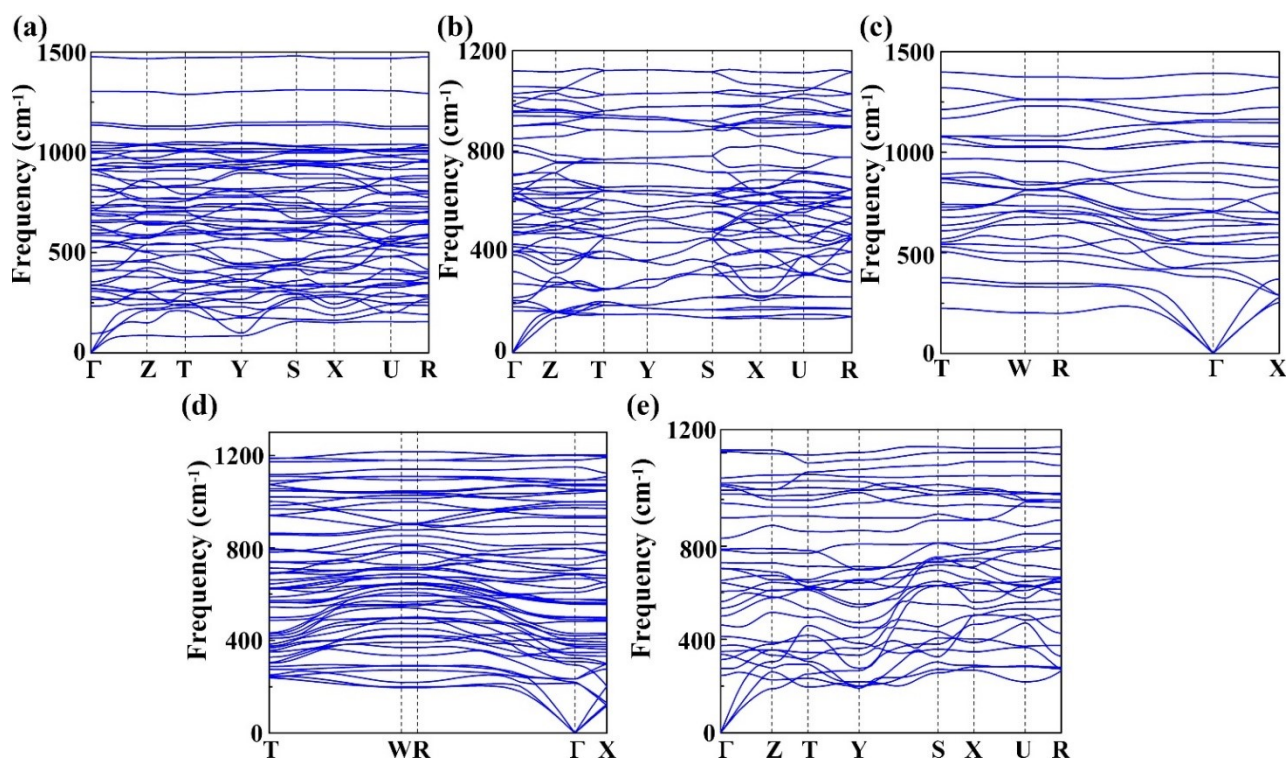

**Figure S6.** Phonon dispersion curves for (a) *Pmm2* KB<sub>5</sub>, (b) *Pmma* KB<sub>7</sub>, (c) *Immm* KB<sub>8</sub>, (d) *Immm* KB<sub>9</sub> and (e) *Pmmm* KB<sub>10</sub> at selected pressures.

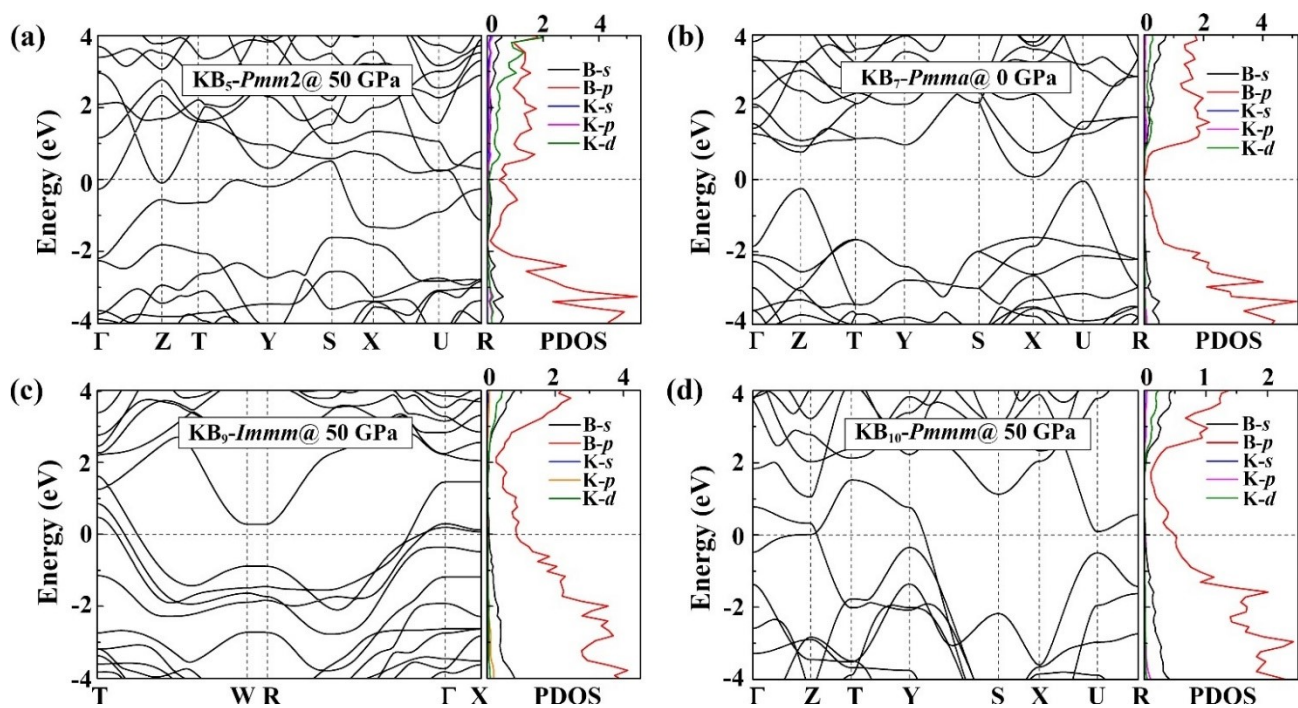

**Figure S7.** Electronic band structures and corresponding projected density of states (PDOS) of (a) *Pmm2* KB<sub>5</sub>, (b) *Pmma* KB<sub>7</sub>, (c) *Immm* KB<sub>9</sub> and (d) *Pmmm* KB<sub>10</sub> at selected pressures.

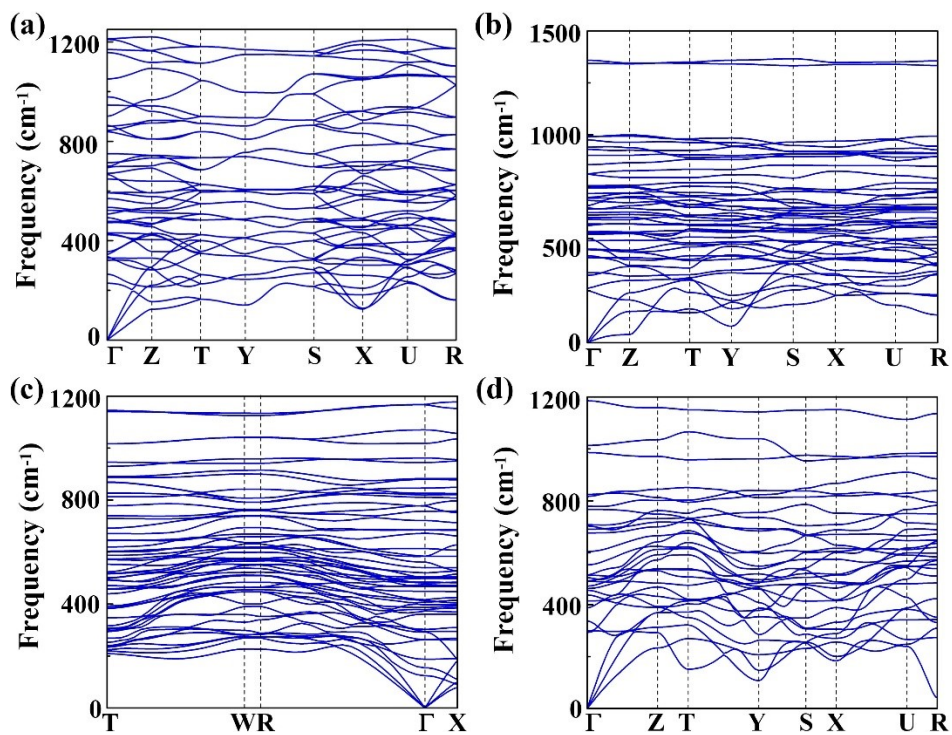

**Figure S8.** Phonon dispersion curves for (a) *o*-B<sub>14</sub>, (b) *o*-B<sub>15</sub>, (c) *o*-B<sub>36</sub> and (d) *o*-B<sub>10</sub> at 1 atm.

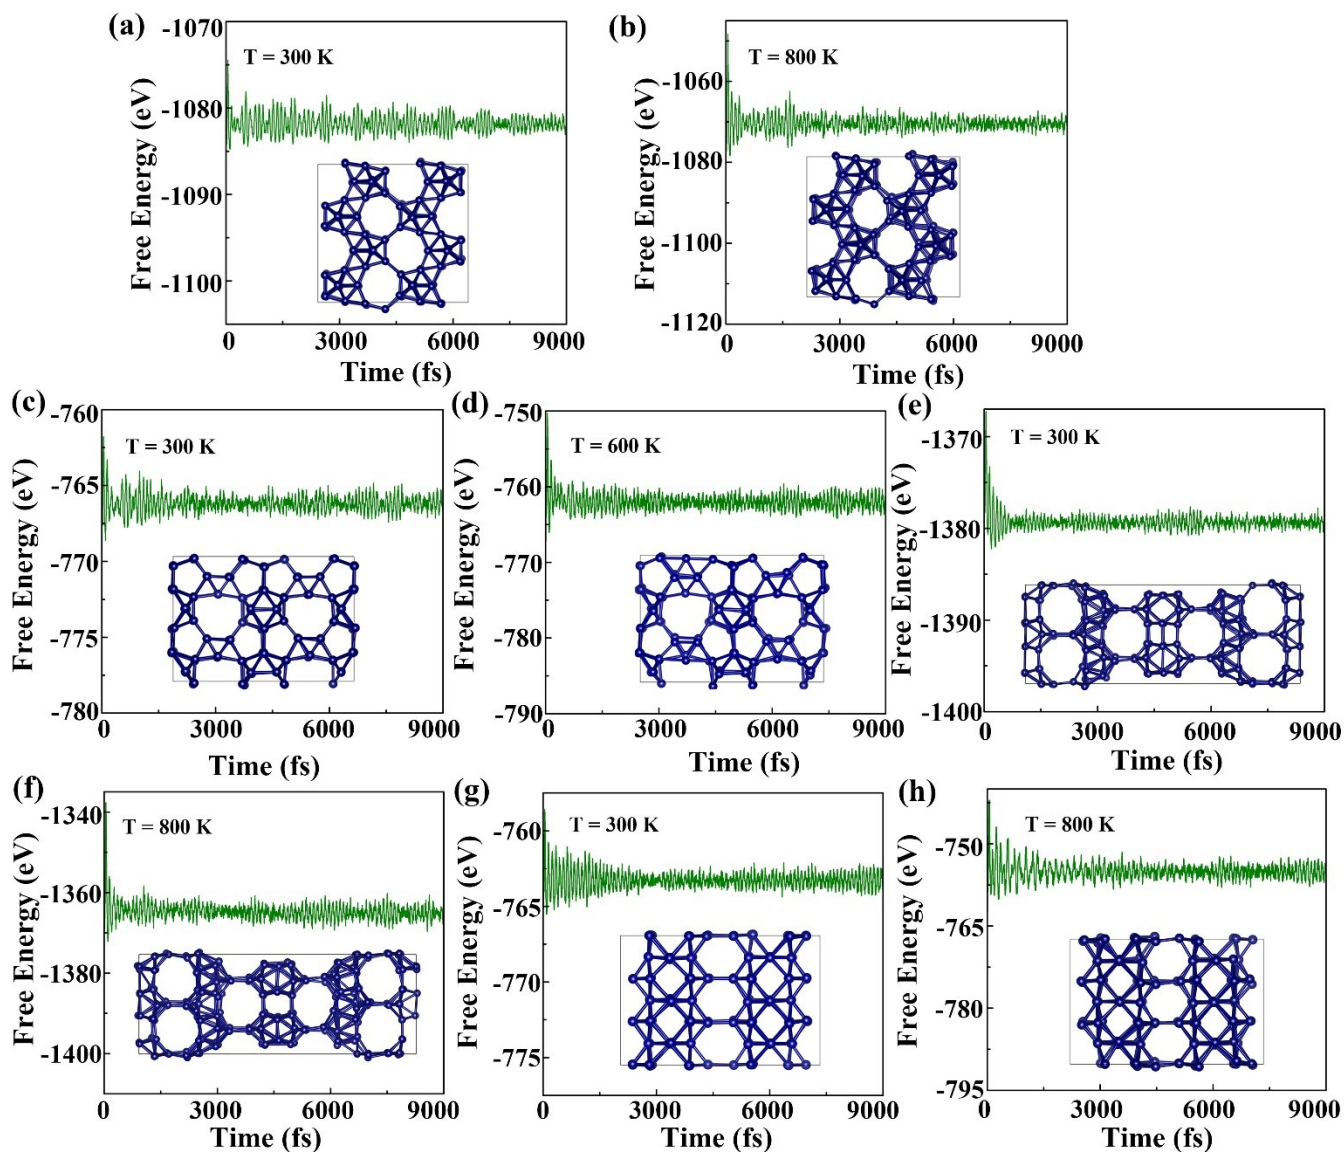

**Figure S9.** The free energy fluctuation of boron allotropes supercell varies with the time step of MD simulations for  $o$ -B<sub>14</sub> at (a) 300 K and (b) 800 K,  $o$ -B<sub>15</sub> at (c) 300 K and (d) 600 K,  $o$ -B<sub>36</sub> at (e) 300 K and (f) 800 K, and  $o$ -B<sub>10</sub> at (g) 300 K and (h) 800 K, showing the snapshot of the simulated system.

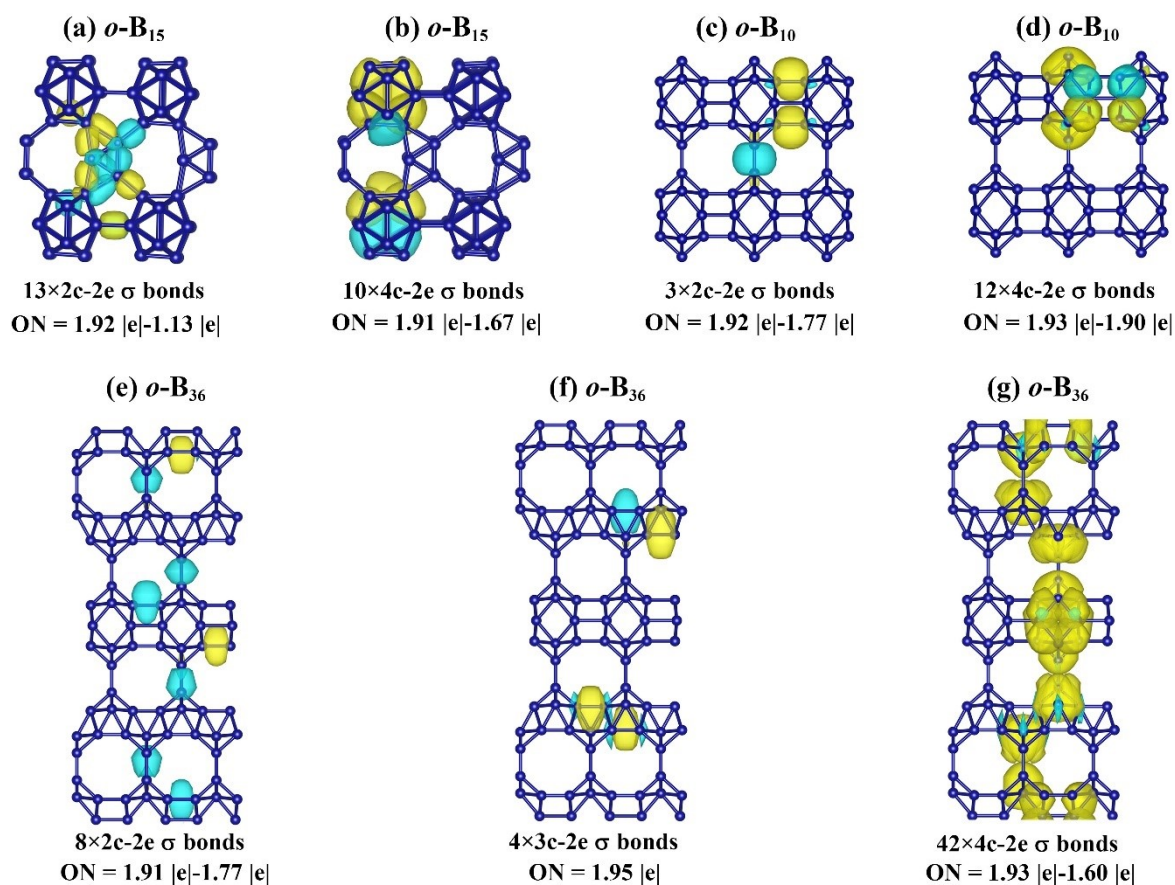

**Figure S10.** The SSAdNDP chemical bonding analysis of  $o\text{-B}_{15}$ ,  $o\text{-B}_{10}$  and  $o\text{-B}_{36}$  with the occupation number (ON). For  $o\text{-B}_{15}$ , total 23 bonds are shown, including (a) thirteen  $2c\text{-}2e$   $\sigma$  bonds and (b) ten  $4c\text{-}2e$   $\sigma$  bonds. For  $o\text{-B}_{10}$ , total 15 bonds are shown, including (c) three  $2c\text{-}2e$   $\sigma$  bonds and (d) twelve  $4c\text{-}2e$   $\sigma$  bonds. For  $o\text{-B}_{36}$ , total 54 bonds are shown, including (e) eight  $2c\text{-}2e$   $\sigma$  bonds, (f) four  $3c\text{-}2e$   $\sigma$  bonds and (g) forty-two  $4c\text{-}2e$   $\sigma$  bonds.



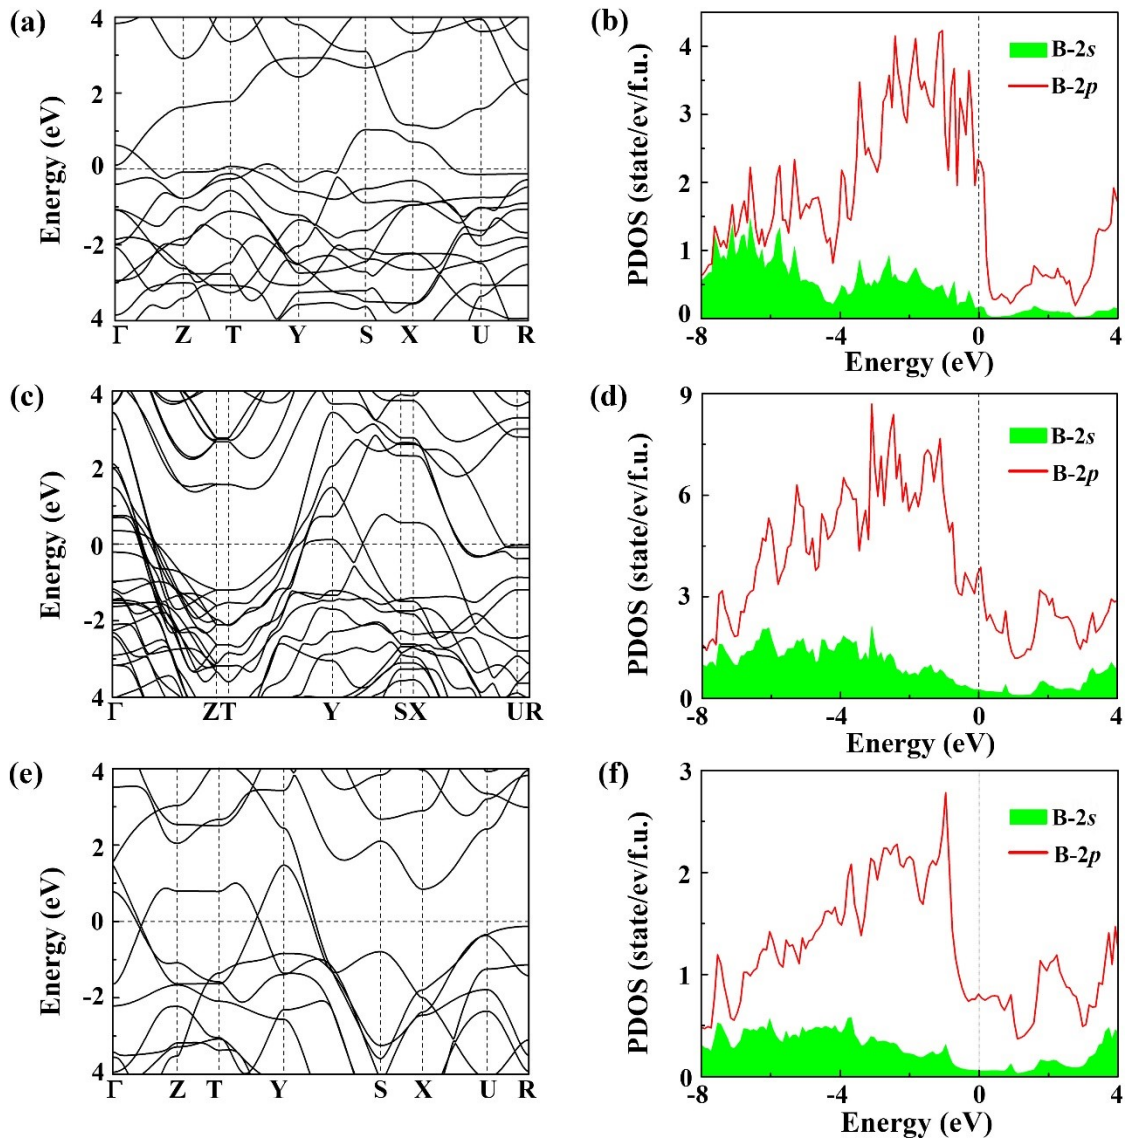

**Figure S11.** Electronic band structures for (a) *o*-B<sub>15</sub>, (c) *o*-B<sub>36</sub> and (e) *o*-B<sub>10</sub> at 1 atm, corresponding projected density of states (PDOS) for (b) *o*-B<sub>15</sub>, (d) *o*-B<sub>36</sub> and (f) *o*-B<sub>10</sub> at 1 atm.

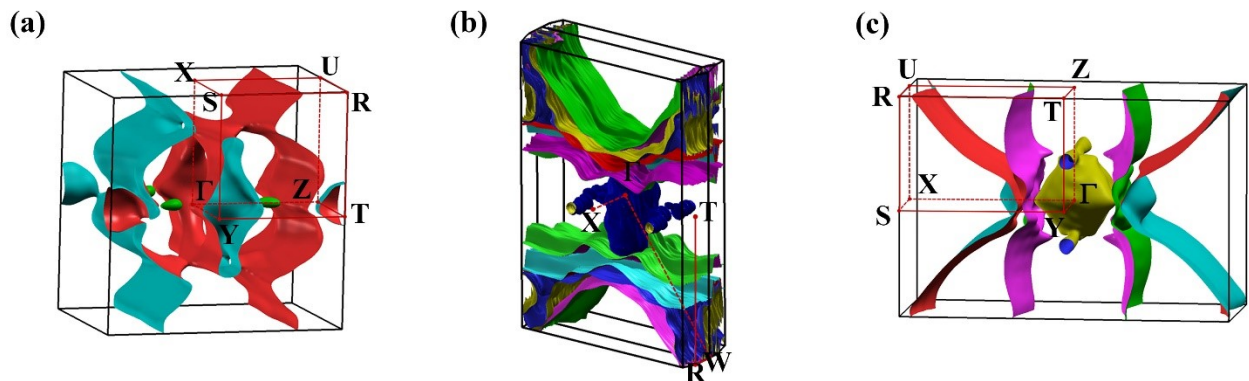

**Figure S12.** The Fermi surface for (a) *o*-B<sub>15</sub>, (b) *o*-B<sub>36</sub> and (c) *o*-B<sub>10</sub> at 1 atm.

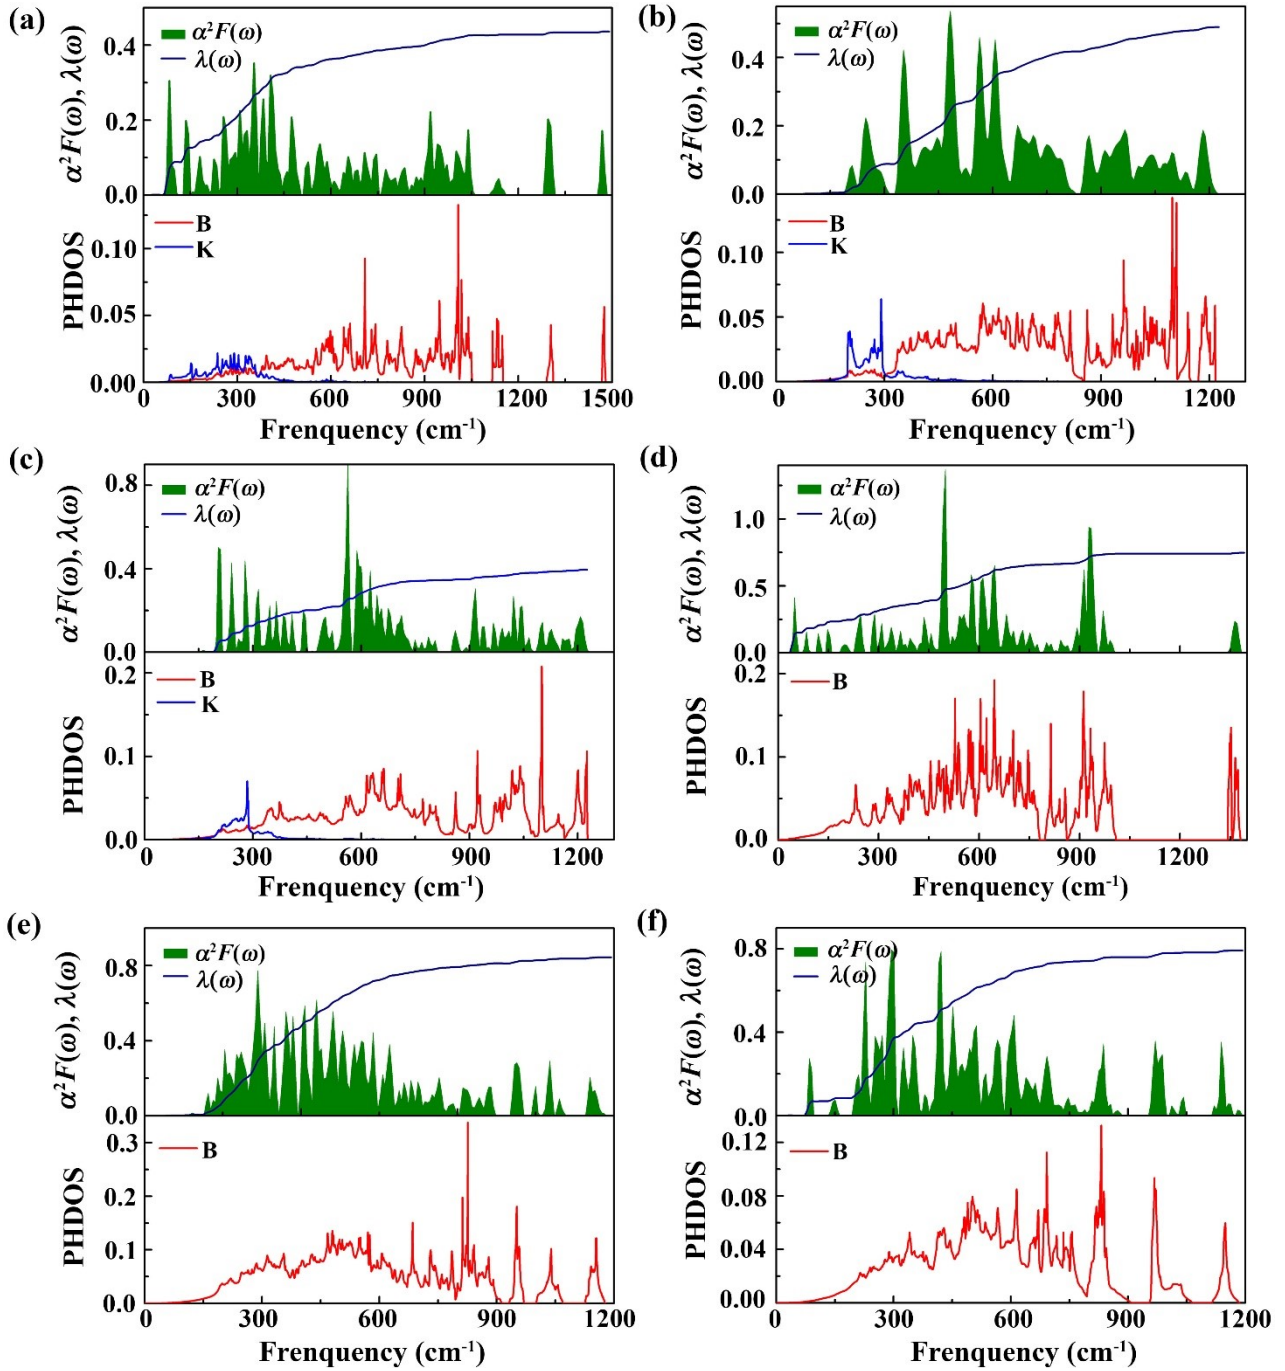

**Figure S13.** The Eliashberg phonon spectral function  $\alpha^2F(\omega)$  together with the integrated electron-phonon spectral coupling  $\lambda(\omega)$  and the projected phonon density of state (PHDOS) of (a)  $Pmm2$   $\text{KB}_5$ , (b)  $Immm$   $\text{KB}_9$ , (c)  $Pmmm$   $\text{KB}_{10}$  at 50 GPa and (d)  $o\text{-B}_{15}$ , (e)  $o\text{-B}_{36}$ , (f)  $o\text{-B}_{10}$  at 0 GPa.

## Supplemental table

**Table S1.** Structural information of the predicted stable K–B phases and metastable K–B phases.

| Structure                                   | Pressure | Lattice Parameters<br>(Å, °)                                                    | Atomic positions                                                                                                                                                                                                                      |
|---------------------------------------------|----------|---------------------------------------------------------------------------------|---------------------------------------------------------------------------------------------------------------------------------------------------------------------------------------------------------------------------------------|
| <i>P6<sub>3</sub>/mmc</i> KB                | 25 GPa   | $a = b = 4.6607$<br>$c = 3.0280$<br>$\alpha = \beta = \gamma = 90$              | B (2a) (0.00000, 0.00000, 0.00000)<br>K (2d) (0.33333, 0.66667, 0.75000)                                                                                                                                                              |
| <i>Imma</i> K <sub>2</sub> B <sub>3</sub>   | 10 GPa   | $a = 8.7022$<br>$b = 5.0299$<br>$c = 6.3197$<br>$\alpha = \beta = \gamma = 90$  | B1 (8h) (0.00000, 1.07859, 0.62691)<br>B2 (4e) (0.00000, 0.75000, 0.62566)<br>K (8i) (0.18473, 0.75000, 1.00069)                                                                                                                      |
| <i>I4/mmm</i> K <sub>2</sub> B <sub>3</sub> | 50 GPa   | $a = b = 4.1508$<br>$c = 11.5340$<br>$\alpha = \beta = \gamma = 90$             | B1 (4e) (0.00000, 0.00000, -0.89298)<br>B2 (8i) (0.00000, -0.29209, 0.00000)<br>K1 (4e) (0.00000, 0.00000, -0.61752)<br>K2 (4d) (0.00000, -0.50000, -0.25000)                                                                         |
| <i>I-4m2</i> KB <sub>3</sub>                | 100 GPa  | $a = b = 4.1143$<br>$c = 10.0127$<br>$\alpha = \beta = \gamma = 90$             | B1 (8i) (-0.50000, 0.18979, 0.38442)<br>B2 (8i) (-0.50000, 0.28738, 0.22449)<br>B3 (2a) (0.00000, 0.00000, 0.00000)<br>K1 (4f) (0.00000, 0.50000, 0.37218)<br>K2 (2b) (0.00000, 0.00000, 0.50000)                                     |
| <i>Pbam</i> KB <sub>6</sub>                 | 25 GPa   | $a = 10.7009$<br>$b = 5.5374$<br>$c = 3.9879$<br>$\alpha = \beta = \gamma = 90$ | B1 (8i) (0.41214, 0.86434, 0.71402)<br>B2 (4g) (0.45085, 0.11586, 0.00000)<br>B3 (4g) (0.19346, 0.51333, 0.00000)<br>B4 (4g) (0.53367, 0.36387, 0.00000)<br>B5 (4g) (0.31489, 0.70955, 0.00000)<br>K (4h) (0.35032, 0.36849, 0.50000) |
| <i>R-3m</i> KB <sub>7</sub>                 | 50 GPa   | $a = b = 4.4233$<br>$c = 19.5621$<br>$\alpha = \beta = 90$<br>$\gamma = 120$    | B1 (18h) (0.13420, -0.13420, 0.68299)<br>B2 (6c) (0.00000, 0.00000, 0.45161)<br>B3 (6c) (0.00000, 0.00000, 0.81006)<br>K (18h) (-0.395488, -0.19774, 0.59631)                                                                         |
| <i>Pmm2</i> KB <sub>5</sub>                 | 50 GPa   | $a = 6.6311$<br>$b = 4.5941$<br>$c = 4.4626$<br>$\alpha = \beta = \gamma = 90$  | B1 (4i) (0.12852, 0.68962, -0.14935)<br>B2 (1c) (0.50000, 0.00000, -0.39382)<br>B3 (2e) (0.21362, 0.00000, -0.95283)<br>B4 (2e) (0.61688, 0.00000, -0.69856)                                                                          |

|                              |        |                                                                                 |                                                                                                                                                                                                                                                                                                                                    |
|------------------------------|--------|---------------------------------------------------------------------------------|------------------------------------------------------------------------------------------------------------------------------------------------------------------------------------------------------------------------------------------------------------------------------------------------------------------------------------|
|                              |        |                                                                                 | B5 (2e) (0.76123, 0.00000, -0.33459)                                                                                                                                                                                                                                                                                               |
|                              |        |                                                                                 | B6 (2g) (1.00000, 0.18235, -0.83710)                                                                                                                                                                                                                                                                                               |
|                              |        |                                                                                 | B7 (2g) (1.00000, 0.81903, -0.45852)                                                                                                                                                                                                                                                                                               |
|                              |        |                                                                                 | K1 (1d) (0.50000, 0.50000, -0.12522)                                                                                                                                                                                                                                                                                               |
|                              |        |                                                                                 | K2 (2f) (0.70659, 0.50000, -0.64037)                                                                                                                                                                                                                                                                                               |
| <i>Pmma</i> KB <sub>7</sub>  | 0 GPa  | $a = 5.7502$<br>$b = 4.2472$<br>$c = 6.4126$<br>$\alpha = \beta = \gamma = 90$  | B1 (4j) (0.52128, 0.50000, 0.64266)<br>B2 (4j) (0.60090, 0.50000, 0.89548)<br>B3 (4k) (0.75000, 0.78813, 0.72193)<br>B4 (2f) (0.25000, 0.50000, 0.51482)<br>K (2e) (0.25000, 0.00000, 0.81764)                                                                                                                                     |
| <i>Immm</i> KB <sub>9</sub>  | 50 GPa | $a = 22.7841$<br>$b = 4.2593$<br>$c = 2.7619$<br>$\alpha = \beta = \gamma = 90$ | B1 (4e) (0.09862, -1.00000, 0.00000)<br>B2 (8n) (0.27751, -1.20084, -0.50000)<br>B3 (4f) (-0.06009, -1.00000, -0.50000)<br>B4 (4f) (0.21332, -1.00000, -0.50000)<br>B5 (4h) (0.00000, -0.79470, -0.50000)<br>B6 (8n) (-0.04174, -0.30275, 0.00000)<br>B7 (4e) (0.32808, -1.50000, -0.50000)<br>K (4e) (0.36839, -1.00000, 0.00000) |
| <i>Pmmm</i> KB <sub>10</sub> | 50 GPa | $a = 6.0909$<br>$b = 2.7938$<br>$c = 4.3060$<br>$\alpha = \beta = \gamma = 90$  | B1 (4x) (0.34514, 0.50000, 0.30311)<br>B2 (2s) (0.50000, 0.00000, 0.20361)<br>B3 (2k) (0.13479, 0.50000, 0.00000)<br>B4 (2i) (0.27525, 0.00000, 0.00000)<br>K (1c) (0.00000, 0.00000, 0.50000)                                                                                                                                     |

**Table S2.** Bader atomic charges of the predicted metastable K–B phases.

| Structure                    | Pressure (GPa) | Atom | Charge (e) |
|------------------------------|----------------|------|------------|
| <i>Pmm2</i> KB <sub>5</sub>  | 50             | B1   | −0.164     |
|                              |                | B2   | 0.198      |
|                              |                | B3   | 0.244      |
|                              |                | B4   | −0.839     |
|                              |                | B5   | 0.079      |
|                              |                | B6   | −0.064     |
|                              |                | B7   | −0.107     |
|                              |                | K1   | 1.652      |
|                              |                | K2   | 1.589      |
| <i>Pmma</i> KB <sub>7</sub>  | 0              | B1   | −0.054     |
|                              |                | B2   | −0.094     |
|                              |                | B3   | 0.077      |
|                              |                | B4   | −0.610     |
|                              |                | K    | 1.752      |
| <i>Immm</i> KB <sub>9</sub>  | 50             | B1   | −0.058     |
|                              |                | B2   | −0.140     |
|                              |                | B3   | −0.152     |
|                              |                | B4   | 0.047      |
|                              |                | B5   | −0.610     |
|                              |                | B6   | 0.257      |
|                              |                | B7   | −0.104     |
| K                            | 1.643          |      |            |
| <i>Pmmm</i> KB <sub>10</sub> | 50             | B1   | −0.054     |
|                              |                | B2   | −0.094     |
|                              |                | B3   | 0.077      |
|                              |                | B4   | −0.610     |
|                              |                | K    | 1.752      |

**Table S3.** Structural information for the new B allotropes at 1 atm.

| <b>Structure</b>          | <b>Lattice Parameters (Å, °)</b> | <b>Atomic positions</b>               |
|---------------------------|----------------------------------|---------------------------------------|
| <i>o</i> -B <sub>15</sub> | $a = 6.6403$                     | B1 (4i) (0.13930, 0.68483, 0.85095)   |
|                           | $b = 4.6931$                     | B2 (1c) (0.50000, 0.00000, 0.60154)   |
|                           | $c = 4.5870$                     | B3 (2e) (0.22088, 0.00000, 0.04310)   |
|                           | $\alpha = \beta = \gamma = 90$   | B4 (2e) (0.62374, 0.00000, 0.31868)   |
|                           |                                  | B5 (2e) (0.76704, 0.00000, 0.66327)   |
|                           |                                  | B6 (2g) (0.00000, 0.19565, 0.16035)   |
|                           |                                  | B7 (2g) (0.00000, 0.79972, 0.53502)   |
| <i>o</i> -B <sub>14</sub> | $a = 5.6970$                     | B1 (4x) (0.52123, 0.50000, 0.93796)   |
|                           | $b = 4.0479$                     | B2 (4j) (0.55975, 0.50000, 0.89991)   |
|                           | $c = 6.2042$                     | B3 (4k) (0.75000, 0.79171, 0.72973)   |
|                           | $\alpha = \beta = \gamma = 90$   | B4 (2f) (0.25000, 0.50000, 0.52367)   |
| <i>o</i> -B <sub>36</sub> | $a = 23.8183$                    | B1 (4e) (-0.10179, 0.00000, 0.00000)  |
|                           | $b = 4.2733$                     | B2 (4e) (-0.82793, 0.00000, 0.00000)  |
|                           | $c = 2.8125$                     | B3 (8n) (-0.28016, 0.19841, 0.50000)  |
|                           | $\alpha = \beta = \gamma = 90$   | B4 (8n) (-0.44748, -0.20083, 0.50000) |
|                           |                                  | B5 (4f) (-0.44172, -0.50000, 0.00000) |
|                           |                                  | B6 (4f) (-0.21494, 0.00000, 0.50000)  |
|                           |                                  | B7 (4h) (0.00000, -0.27352, 0.50000)  |
| <i>o</i> -B <sub>10</sub> | $a = 6.5336$                     | B1 (4x) (0.30695, 0.50000, 0.29846)   |
|                           | $b = 2.8213$                     | B2 (2s) (0.50000, 0.00000, 0.27392)   |
|                           | $c = 4.2261$                     | B3 (2k) (0.12775, 0.50000, 0.00000)   |
|                           | $\alpha = \beta = \gamma = 90$   | B4 (2i) (0.28654, 0.00000, 0.00000)   |

**Table S4.** Gibbs free energy differences of  $o$ -B<sub>15</sub>,  $o$ -B<sub>14</sub>,  $o$ -B<sub>36</sub> and  $o$ -B<sub>10</sub> with respect to  $\alpha$ -B<sub>12</sub><sup>3</sup> at 1 atm.

|                      | $G(o\text{-B}_{15}) - G(\alpha\text{-B}_{12})$ | $G(o\text{-B}_{14}) - G(\alpha\text{-B}_{12})$ | $G(o\text{-B}_{36}) - G(\alpha\text{-B}_{12})$ | $G(o\text{-B}_{10}) - G(\alpha\text{-B}_{12})$ |
|----------------------|------------------------------------------------|------------------------------------------------|------------------------------------------------|------------------------------------------------|
| $\Delta G$ (eV/atom) | 0.276                                          | 0.232                                          | 0.292                                          | 0.322                                          |

**Table S5.** Elastic stiffness constants  $C_{ij}$  (GPa), bulk modulus  $B$  (GPa), shear modulus  $G$  (GPa), Pugh criterion ( $B/G$ ), Poisson's ratio  $\nu$  and Vickers hardness  $H_v$  (GPa) for B allotropes.

|                      | $C_{11}$ | $C_{22}$ | $C_{33}$ | $C_{44}$ | $C_{55}$ | $C_{66}$ | $C_{12}$ | $C_{13}$       | $C_{23}$ | $G$ | $B$ | $\nu$ | $B/G$ | $H_v$ |
|----------------------|----------|----------|----------|----------|----------|----------|----------|----------------|----------|-----|-----|-------|-------|-------|
| $o$ -B <sub>15</sub> | 278      | 267      | 421      | 15       | 120      | 8        | 47       | 89             | 25       | 53  | 140 | 0.33  | 2.65  | 3.48  |
| $o$ -B <sub>14</sub> | 414      | 238      | 336      | 41       | 194      | 33       | 32       | $\frac{11}{7}$ | 25       | 87  | 141 | 0.24  | 1.62  | 12.38 |
| $o$ -B <sub>36</sub> | 453      | 499      | 430      | 47       | 134      | 80       | 107      | 80             | 21       | 114 | 199 | 0.26  | 1.75  | 13.53 |
| $o$ -B <sub>10</sub> | 445      | 506      | 436      | 80       | 165      | 63       | 87       | $\frac{11}{5}$ | 239      | 125 | 204 | 0.25  | 1.64  | 15.92 |

In the orthorhombic boron allotropes structures, the nine independent elastic constants meet the following mechanical stability criteria:  $C_{11} > 0$ ,  $C_{22} > 0$ ,  $C_{33} > 0$ ,  $C_{44} > 0$ ,  $C_{55} > 0$ ,  $C_{66} > 0$ ,  $[C_{11} + C_{22} + C_{33} + 2(C_{12} + C_{13} + C_{23})] > 0$ ,  $(C_{11} + C_{22} - 2C_{12}) > 0$ ,  $(C_{11} + C_{33} - 2C_{13}) > 0$ ,  $(C_{22} + C_{33} - 2C_{23}) > 0$ .<sup>4</sup>

**Table S6.** The electron–phonon coupling (EPC) constant  $\lambda$ , the logarithmic average phonon frequency  $\omega_{\log}$ , and the electronic DOS at the Fermi level  $N(\epsilon_f)$  and superconducting transition temperature ( $T_c$ ) for K–B structures and B allotropes at ambient pressure.

| Structure                              | P(GPa) | $\lambda$ | $\omega_{\log}$ (K) | $N(\epsilon_f)$ | $T_c(\text{K})\mu^*=0.1$ |
|----------------------------------------|--------|-----------|---------------------|-----------------|--------------------------|
| $P6_3/mmc$ KB                          | 50     | 0.62      | 88.73               | 3.03            | 2.27                     |
| $I4/mmm$ K <sub>2</sub> B <sub>3</sub> | 25     | 0.11      | 542.86              | 4.48            | 0                        |
| $Pm\text{-}3m$ KB <sub>6</sub>         | 0      | 0.54      | 790.63              | 11.05           | 12.41                    |
| $R\text{-}3m$ KB <sub>7</sub>          | 50     | 0.24      | 910.87              | 1.93            | 0.03                     |
| $Pmm2$ KB <sub>5</sub>                 | 50     | 0.44      | 398.83              | 10.53           | 2.66                     |
| $Immm$ KB <sub>9</sub>                 | 50     | 0.49      | 703.984             | 10.00           | 7.83                     |
| $Pmmm$ KB <sub>10</sub>                | 50     | 0.44      | 625.06              | 6.06            | 4.33                     |
| $o$ -B <sub>15</sub>                   | 0      | 0.75      | 392.41              | 19.54           | 15.86                    |
| $o$ -B <sub>14</sub>                   | 0      | 0.83      | 582.84              | 18.73           | 29.12                    |
| $o$ -B <sub>36</sub>                   | 0      | 0.84      | 538.89              | 17.93           | 28.11                    |
| $o$ -B <sub>10</sub>                   | 0      | 0.79      | 483.55              | 7.56            | 22.19                    |

**Table S7.** Superconducting properties of B allotropes.

| <b>Structure</b>          | <b>low-frequency(%)</b>         | <b>middle-frequency(%)</b>         | <b>high-frequency(%)</b>       |
|---------------------------|---------------------------------|------------------------------------|--------------------------------|
| <i>o</i> -B <sub>15</sub> | 53.18 (0–470 cm <sup>-1</sup> ) | 45.02 (470–1000 cm <sup>-1</sup> ) | 1.89 (>1000 cm <sup>-1</sup> ) |
| <i>o</i> -B <sub>14</sub> | 60.90 (0–450 cm <sup>-1</sup> ) | 35.57 (450–1080 cm <sup>-1</sup> ) | 3.53 (>1080 cm <sup>-1</sup> ) |
| <i>o</i> -B <sub>36</sub> | 54.75 (0–390 cm <sup>-1</sup> ) | 41.44 (390–900 cm <sup>-1</sup> )  | 3.81 (>900 cm <sup>-1</sup> )  |
| <i>o</i> -B <sub>10</sub> | 56.24 (0–370 cm <sup>-1</sup> ) | 39.68 (370–930 cm <sup>-1</sup> )  | 4.08 (>930 cm <sup>-1</sup> )  |

**Table. S8** Superconducting properties of metastable K–B structures.

| <b>Structure</b>             | <b>low-frequency(%)</b>         | <b>middle-frequency(%)</b>         | <b>high-frequency(%)</b>        |
|------------------------------|---------------------------------|------------------------------------|---------------------------------|
| <i>Pmm2</i> KB <sub>5</sub>  | 63.60 (0–370 cm <sup>-1</sup> ) | 34.14 (370–1200 cm <sup>-1</sup> ) | 2.26 (> 1200 cm <sup>-1</sup> ) |
| <i>Immm</i> KB <sub>9</sub>  | 18.28 (0–300 cm <sup>-1</sup> ) | 79.88 (300–1150 cm <sup>-1</sup> ) | 1.84 (> 1150 cm <sup>-1</sup> ) |
| <i>Pmmm</i> KB <sub>10</sub> | 33.11 (0–300 cm <sup>-1</sup> ) | 65.29 (300–1150 cm <sup>-1</sup> ) | 1.60 (> 1150 cm <sup>-1</sup> ) |

## References

1. L. Xiao, J. Ran, Y. Liu, J. Wu, W. Qiu, F. Lu, F. Shao and P. Peng, *Comput. Condens. Matter*, 2016, **9**, 1–5.
2. Z. Yuan, L. Hao, K. Luo, M. Xiong, C. Shao, F. Ling and D. Yu, *Chem. Phys. Lett.*, 2019, **722**, 80–84.
3. A. R. Oganov and V. L. Solozhenko, *J. Superhard. Mater.*, 2009, **31**, 285.
4. Z.-j. Wu, E.-j. Zhao, H.-p. Xiang, X.-f. Hao, X.-j. Liu and J. Meng, *Phys. Rev. B*, 2007, **76**, 054115.
